# Supplementary material
Source: PubMed Central journal article supplement (PMC2544537)
Supplement: 0805960105_0805960105SI.pdf [file 0805960105_0805960105SI.pdf]

# Supporting Information

Yang et al. 10.1073/pnas.0805960105

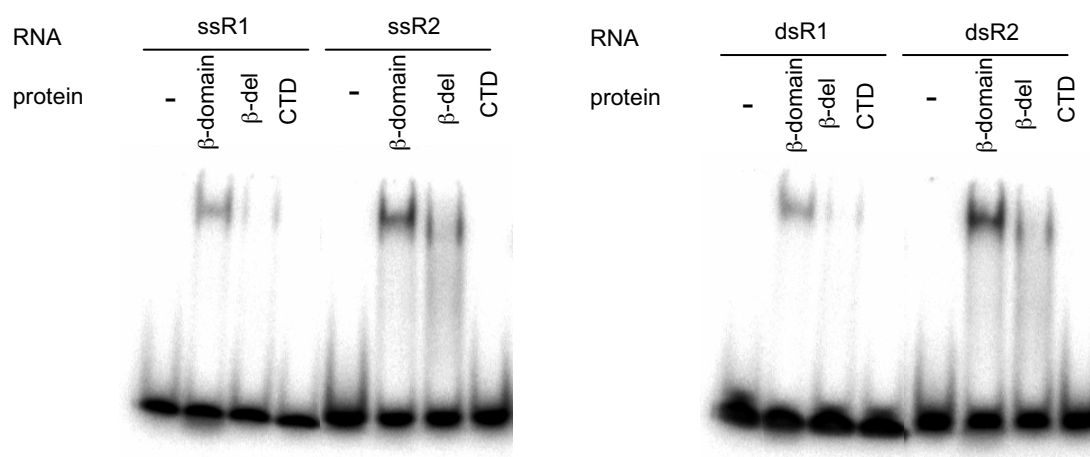

**Fig. S1.** EMSA demonstrates that the  $\beta$ -finger domain ( $\beta$ -domain) binds ss and dsRNA weakly and without sequence specificity.  $\beta$ -finger deletion ( $\beta$ -del) reduces binding, and the C-terminal domain (CTD) of Prp8 does not obviously bind RNA. ssR1 is a 13-nt RNA with arbitrary sequence (GCUUUACGGUGCU). ssR2 is a 13-nt RNA (GAGAUUUUUUCG) from U6 that forms Helix II in the first-step complex. For dsR1 and dsR2, the perfect complement was annealed to ssR1 and ssR2 before addition of protein. Protein concentrations for the  $\beta$ -finger domain,  $\beta$ -del, and CTD are 32, 33, and 33  $\mu$ M, respectively.

**Table S1. Data collection and refinement statistics**

## Data collection

|                                                    |                                                                                                                            |
|----------------------------------------------------|----------------------------------------------------------------------------------------------------------------------------|
| Space group                                        | $P2_12_12_1$ , $a = 78.17$ , $b = 84.81$ , $c = 94.01$ Å,<br>$\alpha = \beta = \gamma = 90^\circ$ , two molecules per a.u. |
| Resolution, Å                                      | 2.05                                                                                                                       |
| Wavelength, Å                                      | 0.9795                                                                                                                     |
| Redundancy*                                        | 12.4 (5.6)                                                                                                                 |
| Completeness, %                                    | 94.5 (68.8)                                                                                                                |
| $R_{\text{merge}}^\dagger$                         | 0.101 (0.322)                                                                                                              |
| $\  \sigma(I) \ $                                  | 33.8 (2.8)                                                                                                                 |
| Refinement statistics ( $ F  > 0$ )                |                                                                                                                            |
| Resolution, Å                                      | 2.05                                                                                                                       |
| $R_{\text{working}}$ (number of reflections)       | 0.214 (61,442)                                                                                                             |
| $R_{\text{free}}^\ddagger$ (number of reflections) | 0.236 (6,712)                                                                                                              |
| Number of protein atoms                            | 4,122                                                                                                                      |
| Number of nonprotein atoms                         | 247 water molecules                                                                                                        |
| rmsd from ideal bond length, Å                     | 0.007                                                                                                                      |
| rmsd from ideal bond angle, °                      | 1.239                                                                                                                      |
| Ramachandran statistics (for non-Pro/Gly residues) |                                                                                                                            |
| Most favored                                       | 438 residues                                                                                                               |
| Additionally allowed                               | 30 residues                                                                                                                |
| Generously allowed                                 | 6 residues                                                                                                                 |
| Disallowed                                         | 0 residues                                                                                                                 |

\*Numbers in parentheses represent values for the highest-resolution bin.

$^\dagger R_{\text{merge}} = \sum |I_{\text{obs}} - I_{\text{avg}}| / \sum I_{\text{avg}}$ .

$^\ddagger R_{\text{free}}$  was calculated with 10% of reflections.
